# Supplementary material
Source: Springer Nature journal article supplement (https://www.springermedizin.de/resource/supplementary/12943_2012_1127_MOESM1_ESM.pdf/9552506)

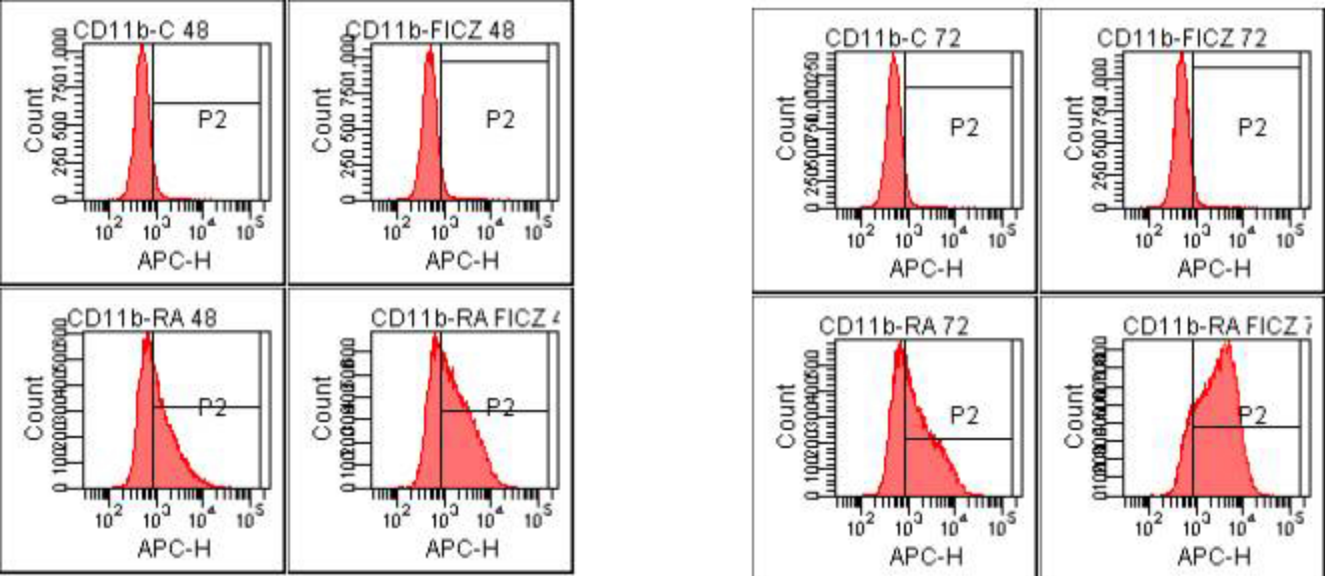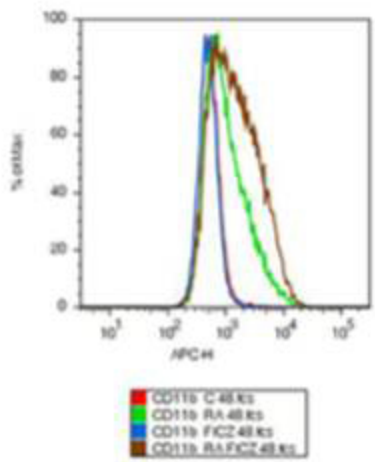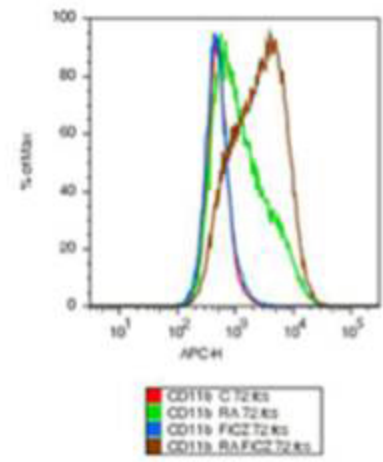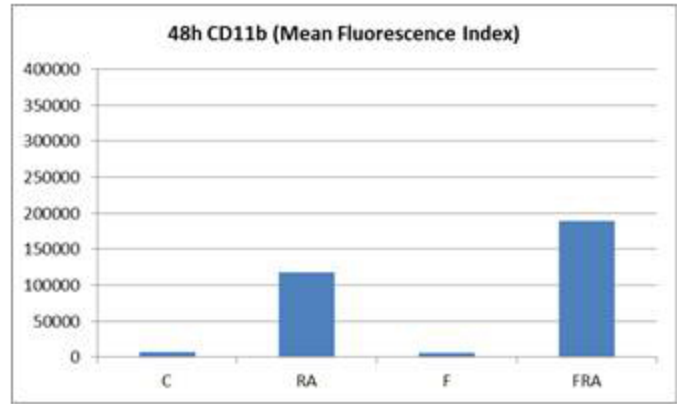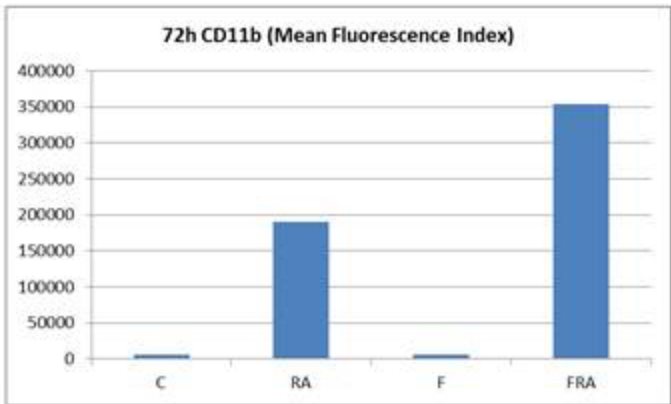

Supplement: MOESM1 [file 9552506]
